# Supplementary material for: Life Cycle Assessment-Based Comparative Study between High-Yield and “Standard” Bottom-Up Procedures for the Fabrication of Carbon Dots
Source: MDPI journal article supplement (doi:10.3390/ma15103446), 2022-05-11
Supplement: s1 [file s1]

## Supplementary Materials

**Table S1.** Inventory of raw materials for each CD under study, in which quantities are referred to 1 kg of CD.

| Ecoinvent® 3.5 database                                                                                                               | CD-1      | CD-2     | CD-3      | CD-4   | CD-5   | CD-6   |
|---------------------------------------------------------------------------------------------------------------------------------------|-----------|----------|-----------|--------|--------|--------|
| Glucose {GLO} market for glucose  APOS, S                                                                                             | 2.49 kg   |          |           |        |        |        |
| Sodium hydroxide, without water, in 50% solution state {GLO} market for  APOS, S                                                      | 1.49 kg   |          |           |        |        |        |
| Hydrogen peroxide, without water, in 50% solution state {GLO} market for  APOS, S                                                     | 0.239 kg  |          |           |        |        |        |
| Citric Acid {GLO} market for  APOS, S                                                                                                 |           | 7.2 kg   | 7.61 kg   | 50 kg  | 2.4 kg | 3 kg   |
| Ethylenediamine {RER} market for  APOS, S                                                                                             |           | 7.2 kg   |           |        |        |        |
| Urea, as N {GLO}  market for  APOS, S                                                                                                 |           |          | 2.54 kg   | 16 kg  | 0.8 kg | 1 kg   |
| Water, deionized, from tap water, at user {Europe without Switzerland}  market for water, deionized, from tap water, at user  APOS, S | 24.9 kg   | 77.9 kg  | 101.5 kg  | 330 kg | 20 kg  | 20 kg  |
| Electricity, medium voltage {RER} market group for  APOS, S                                                                           | 146.8 kWh | 24.2 kWh | 46.09 kWh | 17 kWh | 12 kWh | 17 kWh |

## ReCiPe method

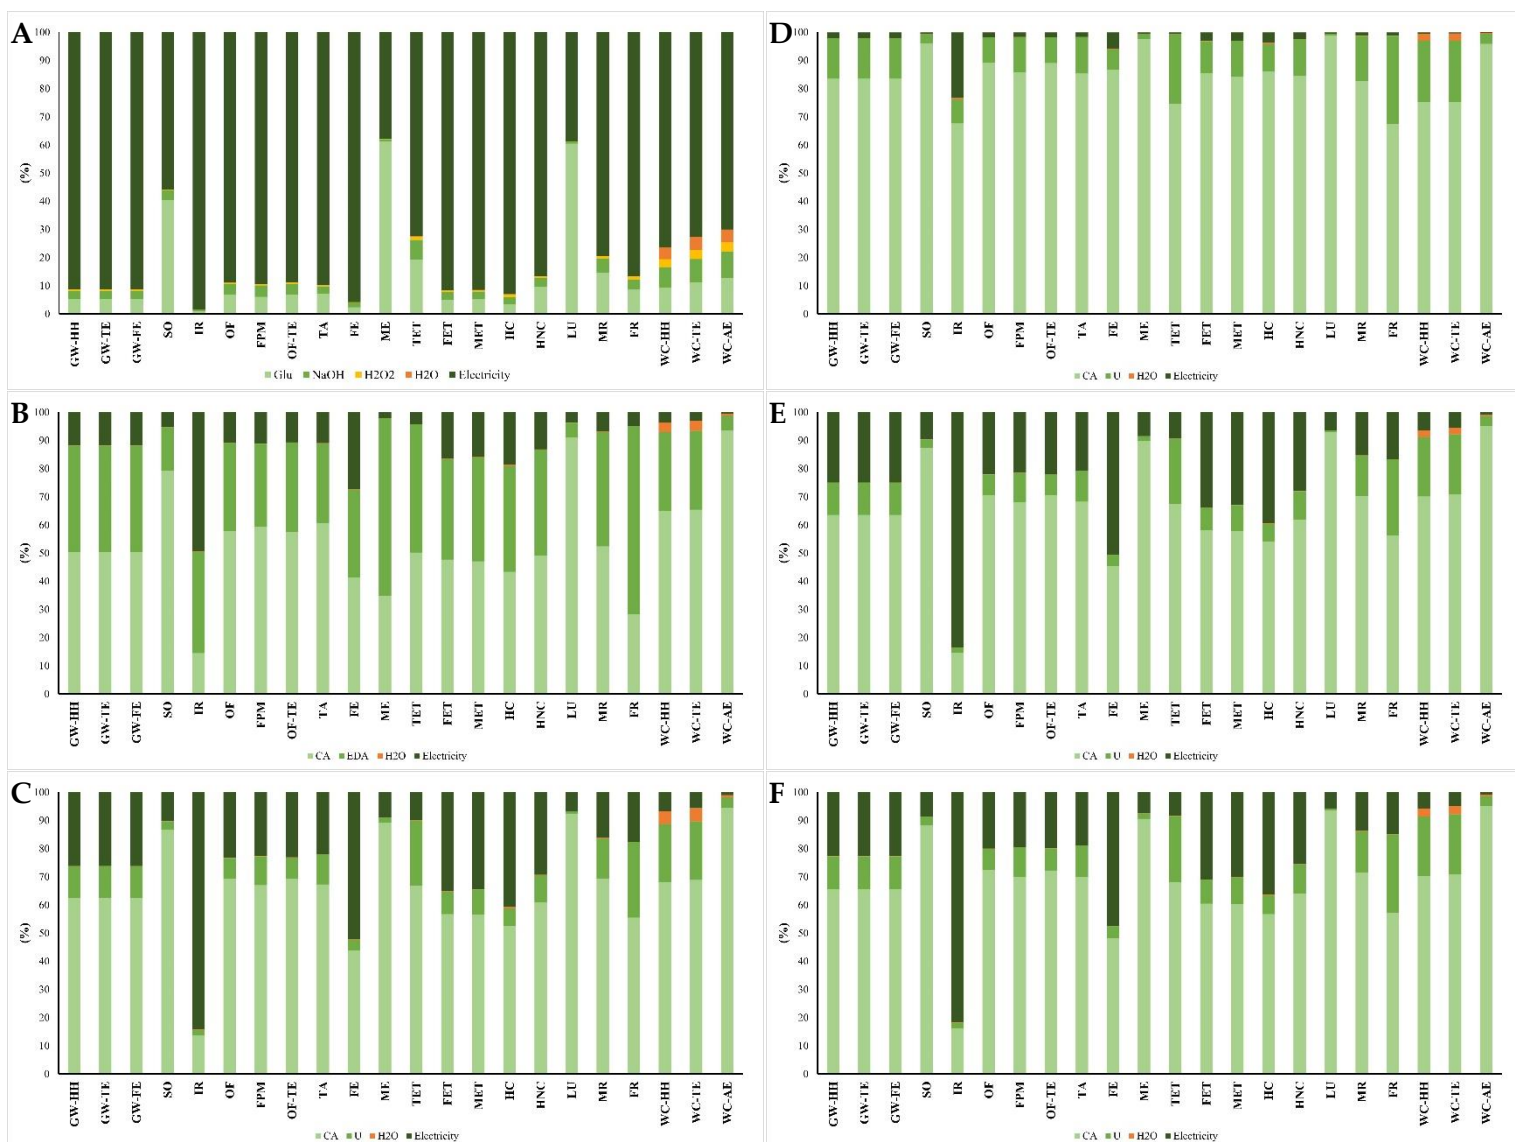

**Figure S1.** Relative environmental impacts of the synthesis under study applying ReCiPe endpoint method. (A) CD-1; (B) CD-2, (C) CD-3; (D) CD-4, (E) CD-5 and (F) CD-6. The abbreviations are explained in Section 2.4.

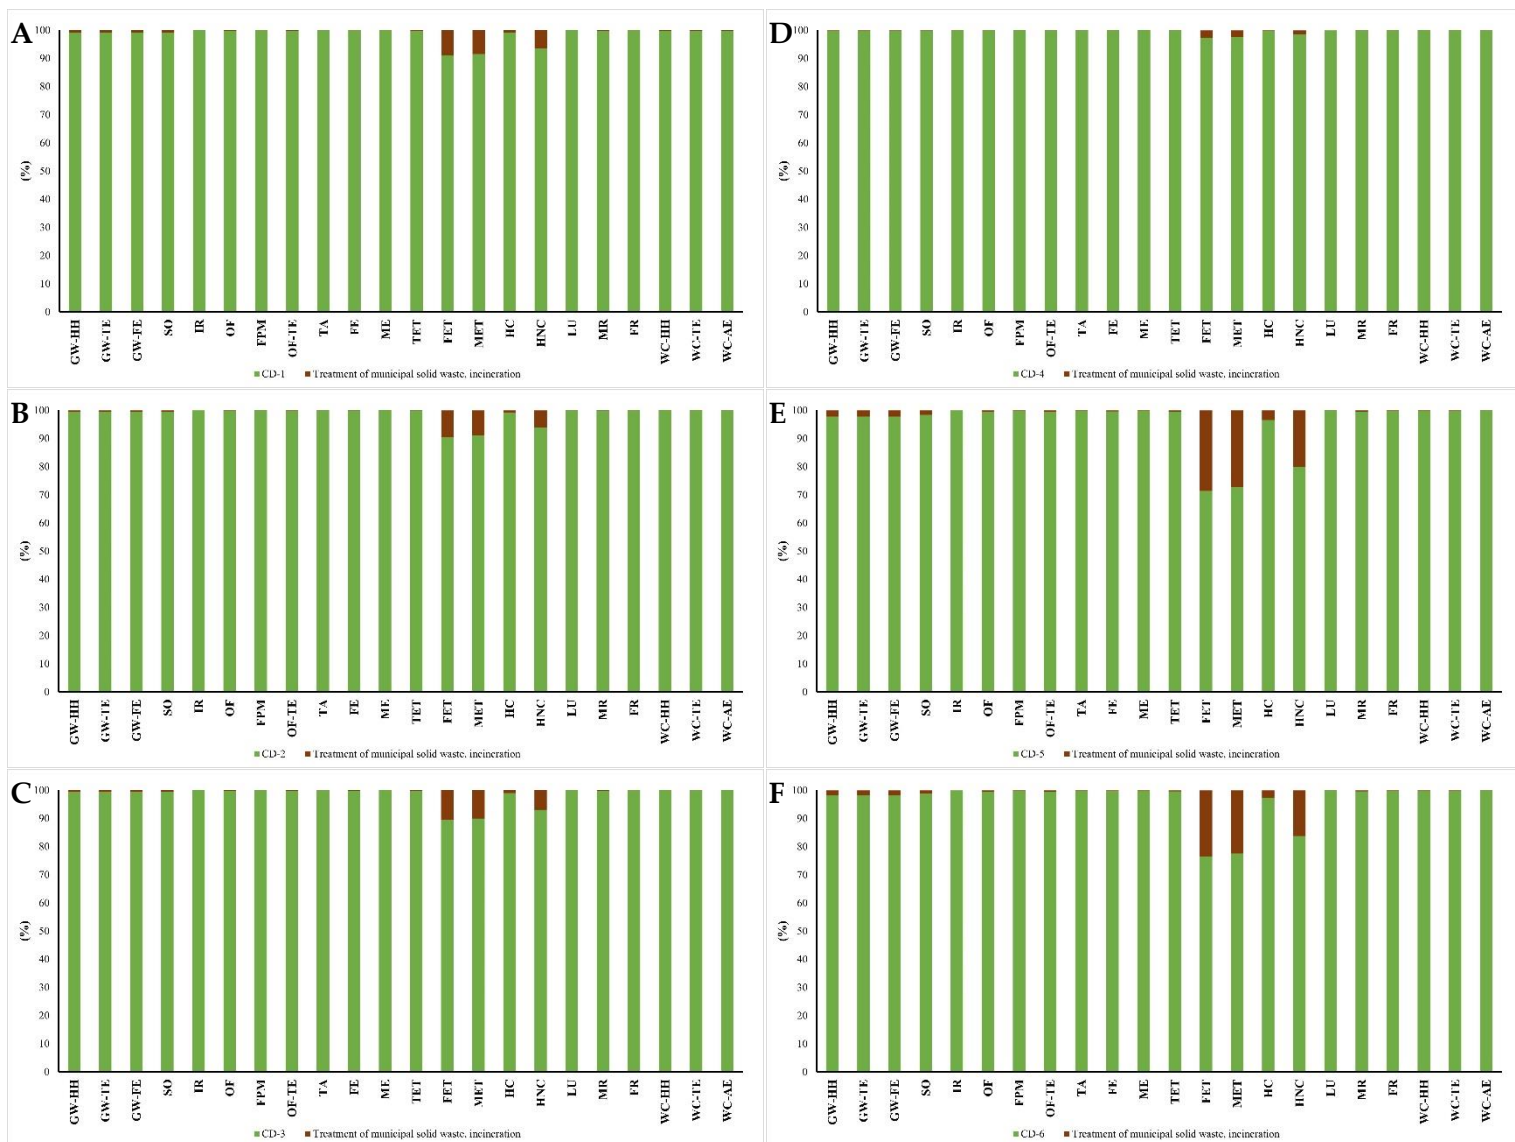

**Figure S2.** Relative environmental impacts of the synthesis under study and the disposal scenario of incineration, applying ReCiPe endpoint method. (A) CD-1; (B) CD-2, (C) CD-3; (D) CD-4, (E) CD-5 and (F) CD-6. The abbreviations are explained in Section 2.4.

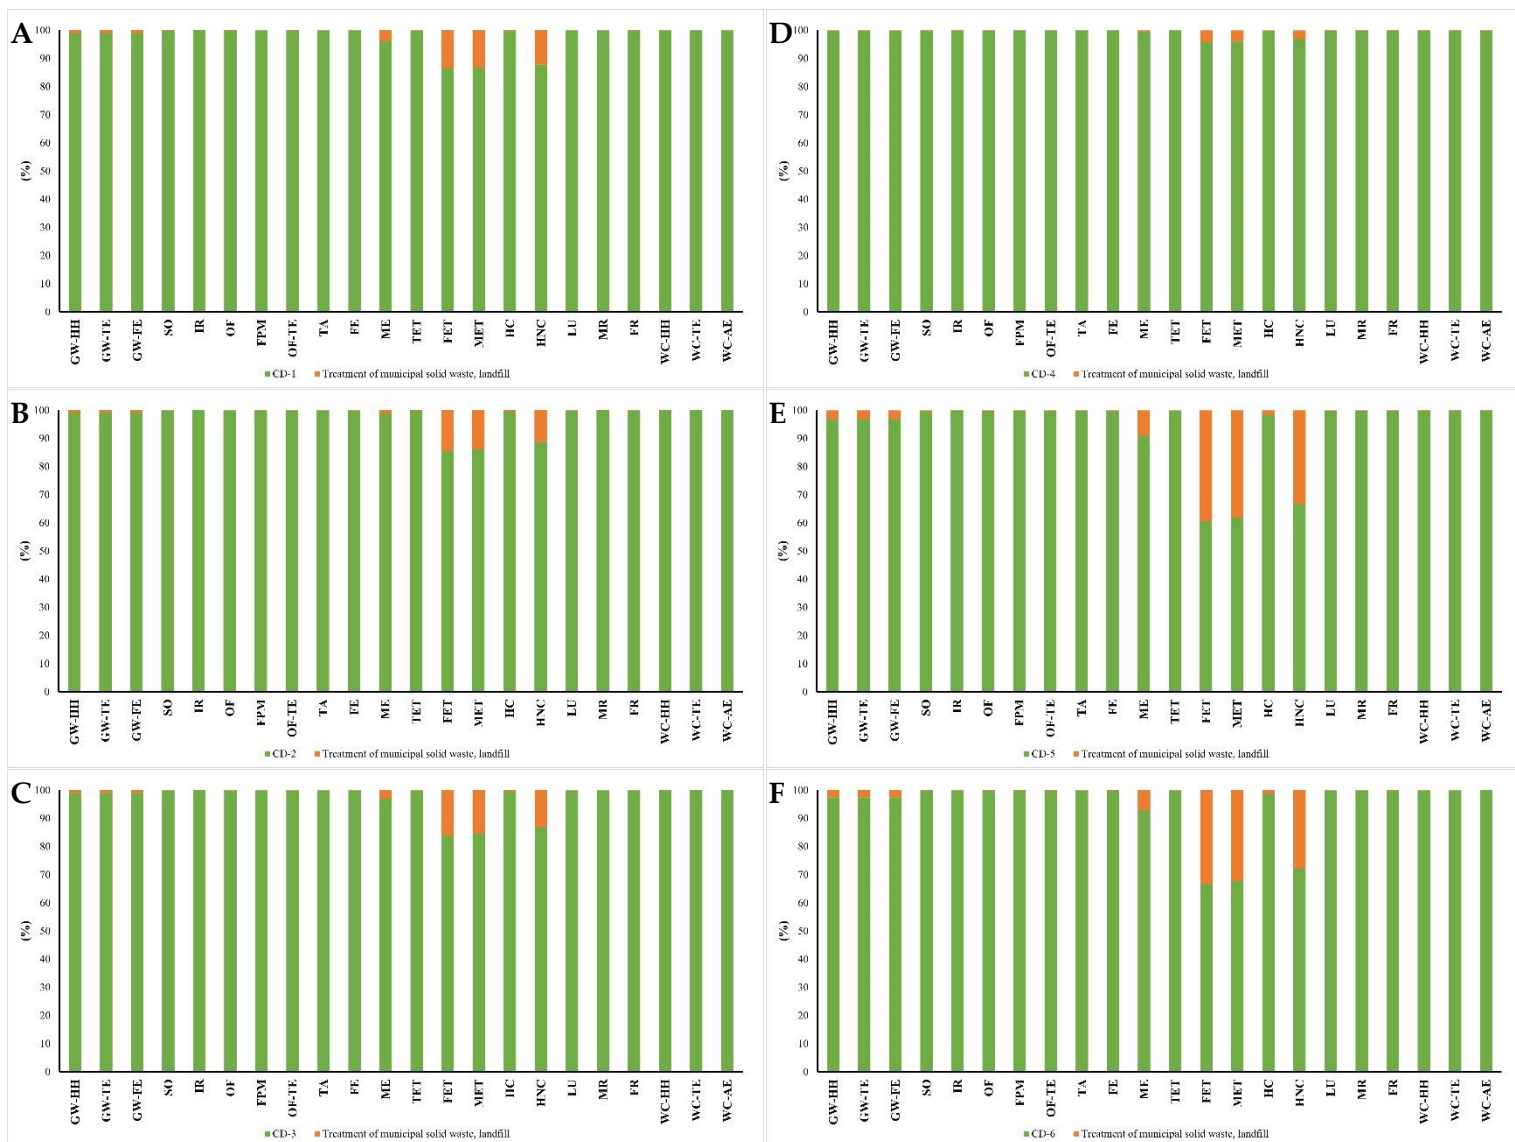

**Figure S3.** Relative environmental impacts of the synthesis under study and the disposal scenario of landfill, applying ReCiPe endpoint method. (A) CD-1; (B) CD-2, (C) CD-3; (D) CD-4, (E) CD-5 and (F) CD-6. The abbreviations are explained in Section 2.4

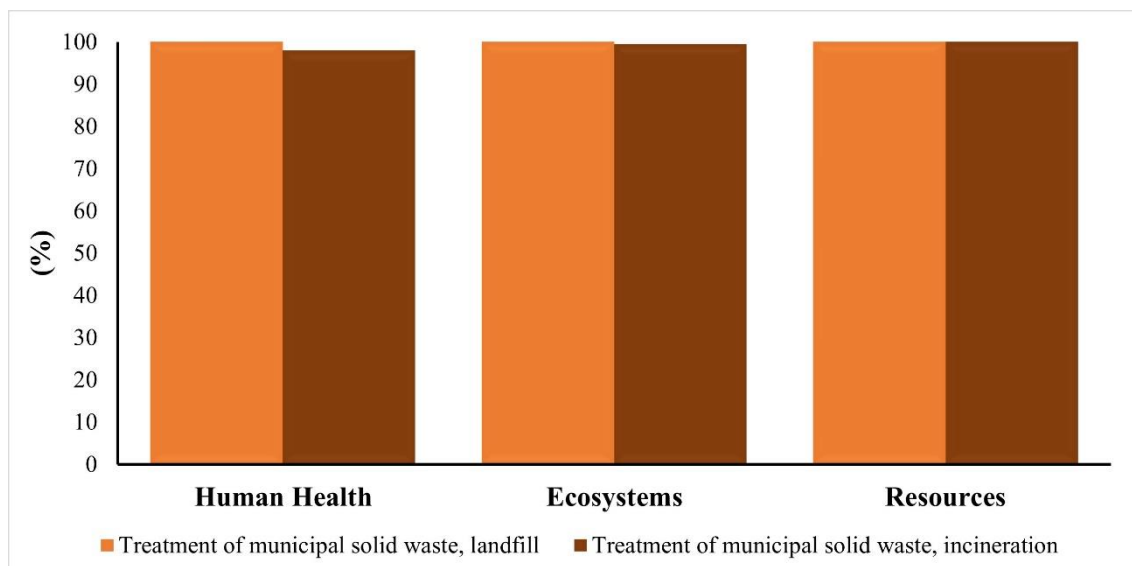

**Figure S4.** Relative environmental impacts of CD-5 for incineration and landfill disposal scenario, applying ReCiPe method.

## Greenhouse Gas Protocol method

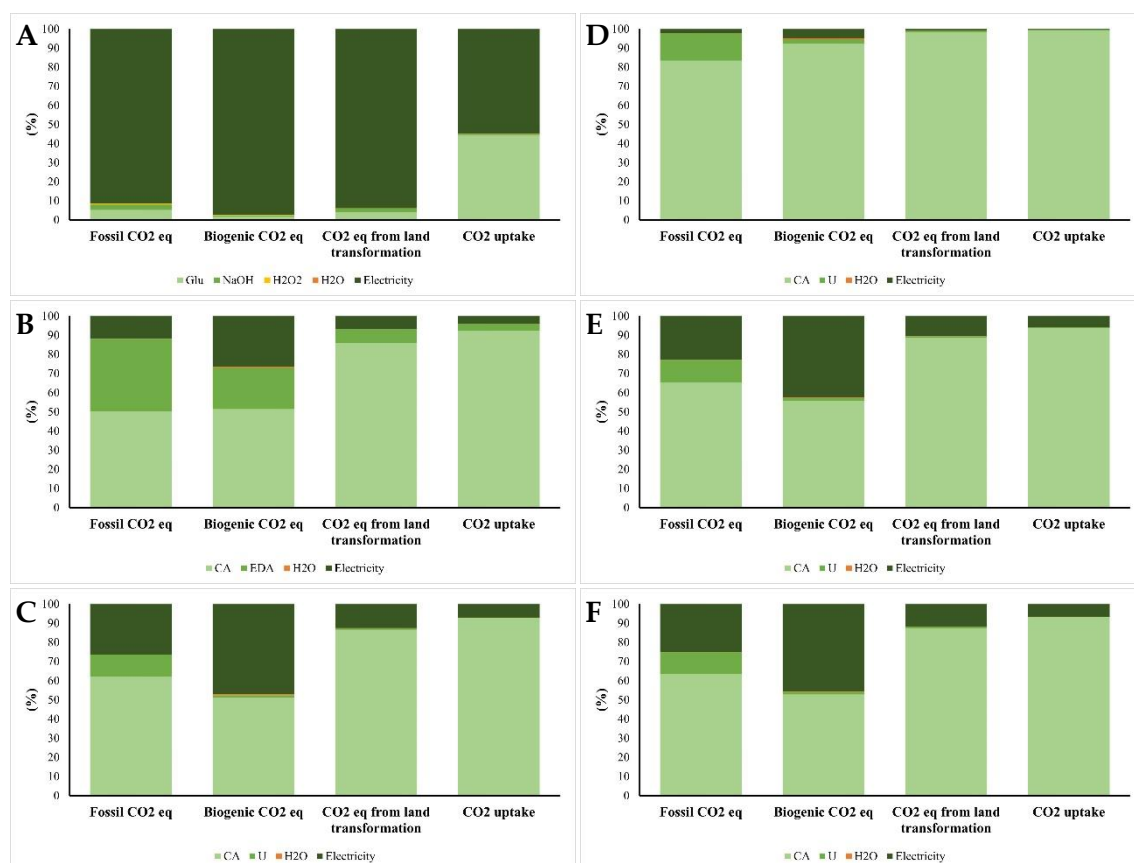

**Figure S5.** Relative environmental impacts of syntheses under study, applying Greenhouse Gas Protocol method. (A) CD-1; (B) CD-2, (C) CD-3; (D) CD-4, (E) CD-5 and (F) CD-6.

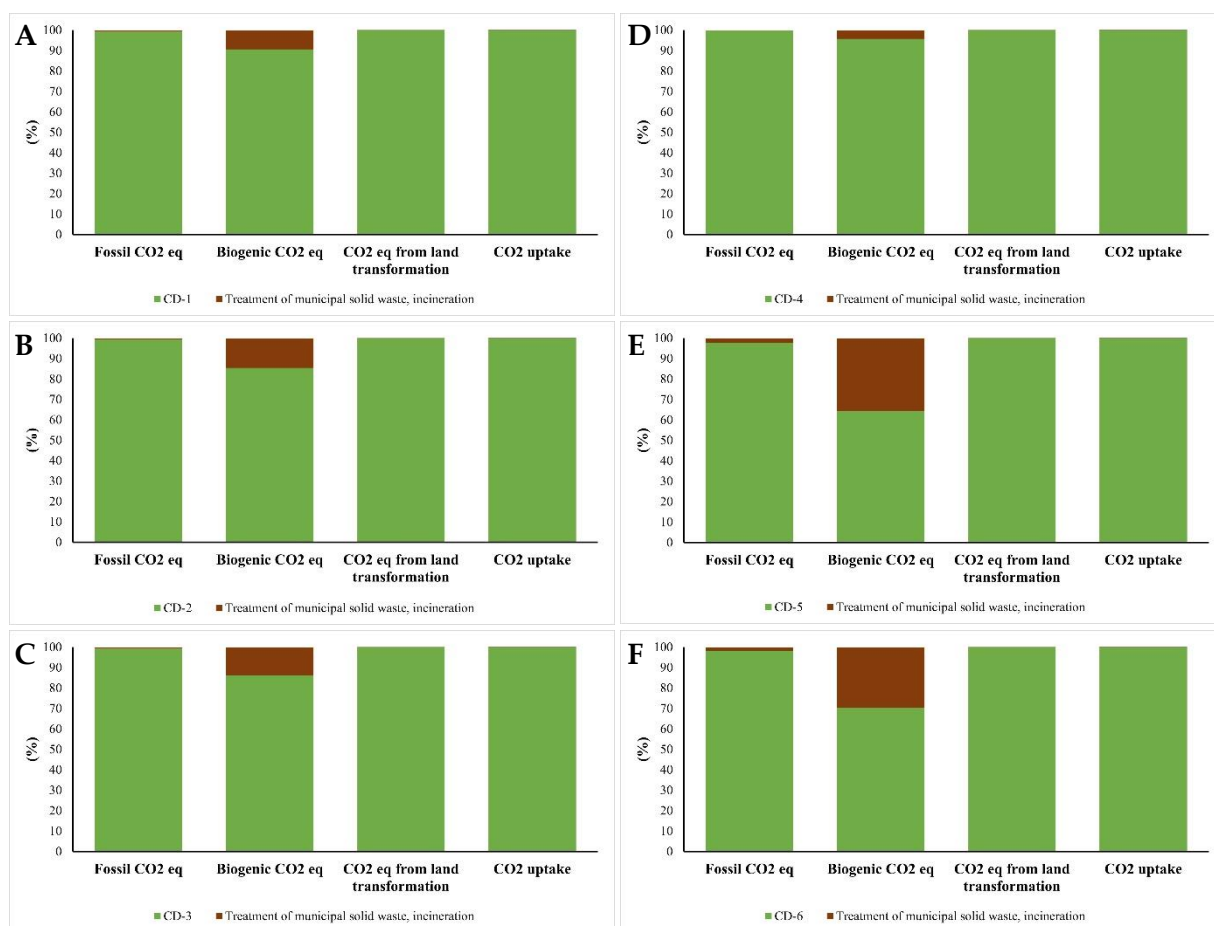

**Figure S6.** Relative environmental impacts of syntheses under study for incineration disposal scenario, applying Greenhouse Gas Protocol method. (A) CD-1; (B) CD-2, (C) CD-3; (D) CD-4, (E) CD-5 and (F) CD-6.

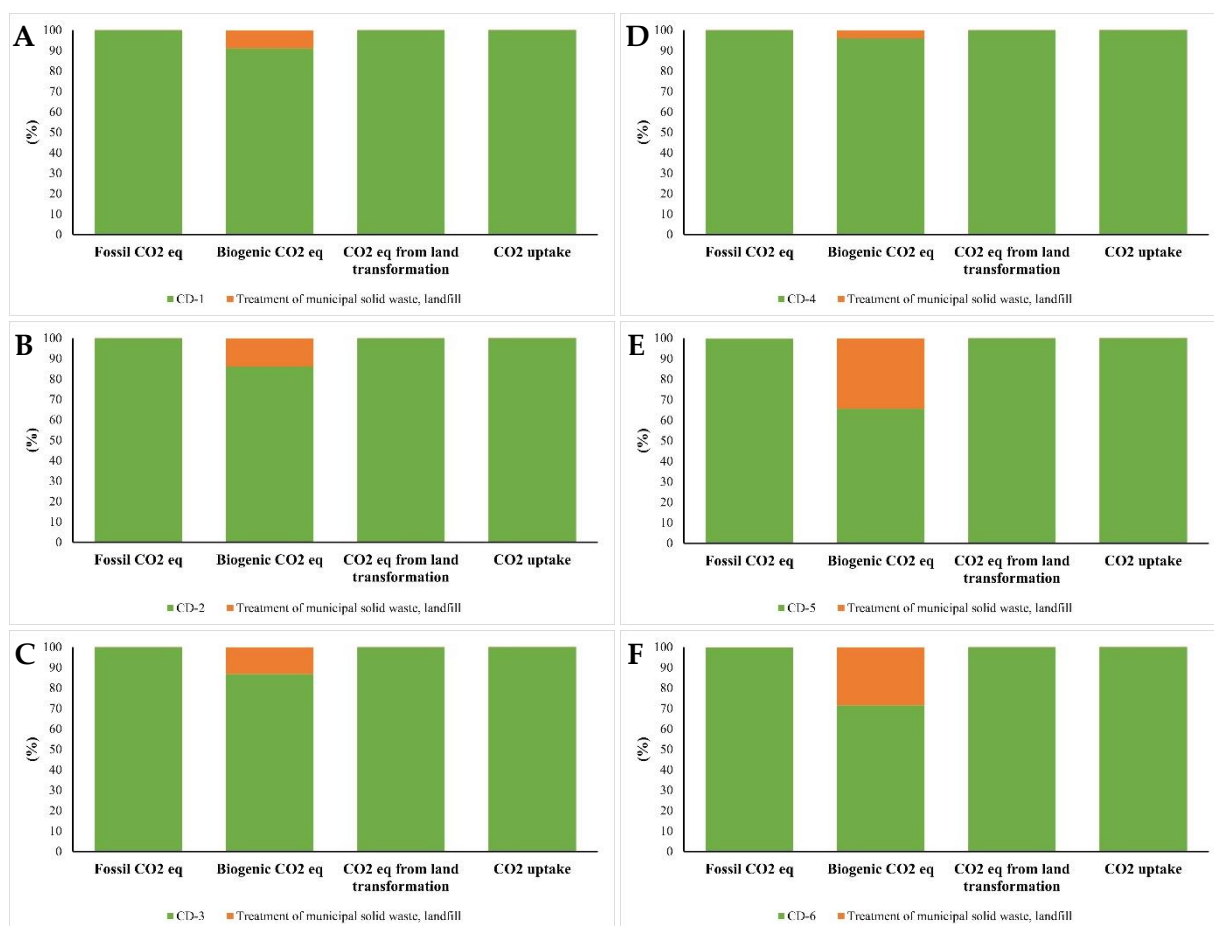

**Figure S7.** Relative environmental impacts of syntheses under study for landfill disposal scenario, applying Greenhouse Gas Protocol method. (A) CD-1; (B) CD-2, (C) CD-3; (D) CD-4, (E) CD-5 and (F) CD-6.



## AWARE method

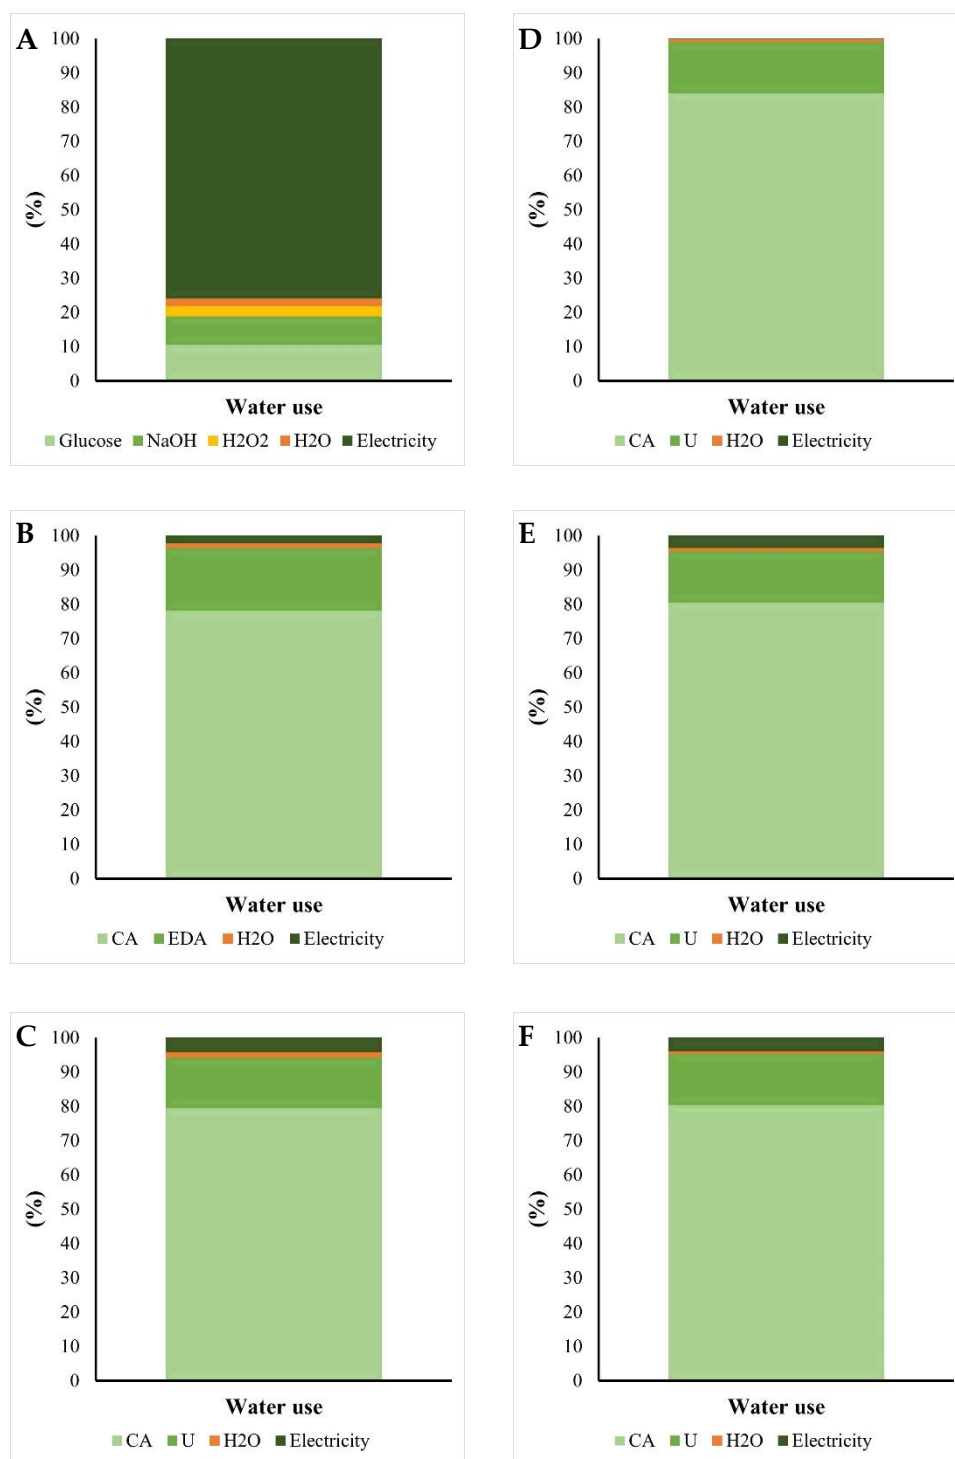

**Figure S8.** Relative environmental impacts of syntheses under, applying AWARE method. (A) CD-1; (B) CD-2, (C) CD-3; (D) CD-4, (E) CD-5 and (F) CD-6.

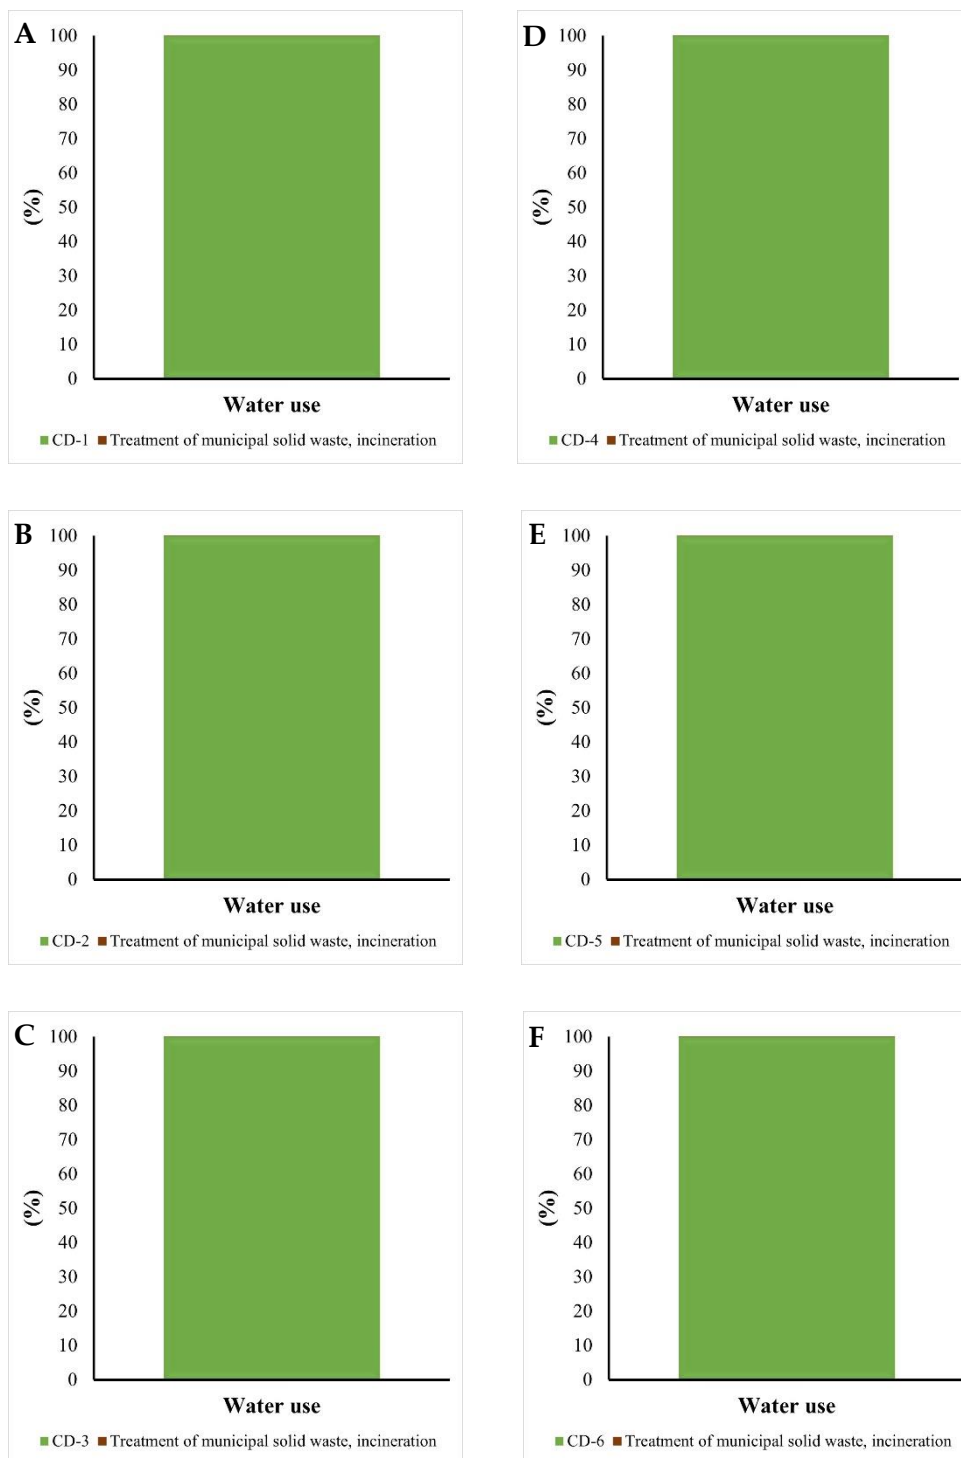

**Figure S9.** Relative environmental impacts of syntheses under for incineration disposal scenario, applying AWARE method. (A) CD-1; (B) CD-2, (C) CD-3; (D) CD-4, (E) CD-5 and (F) CD-6.

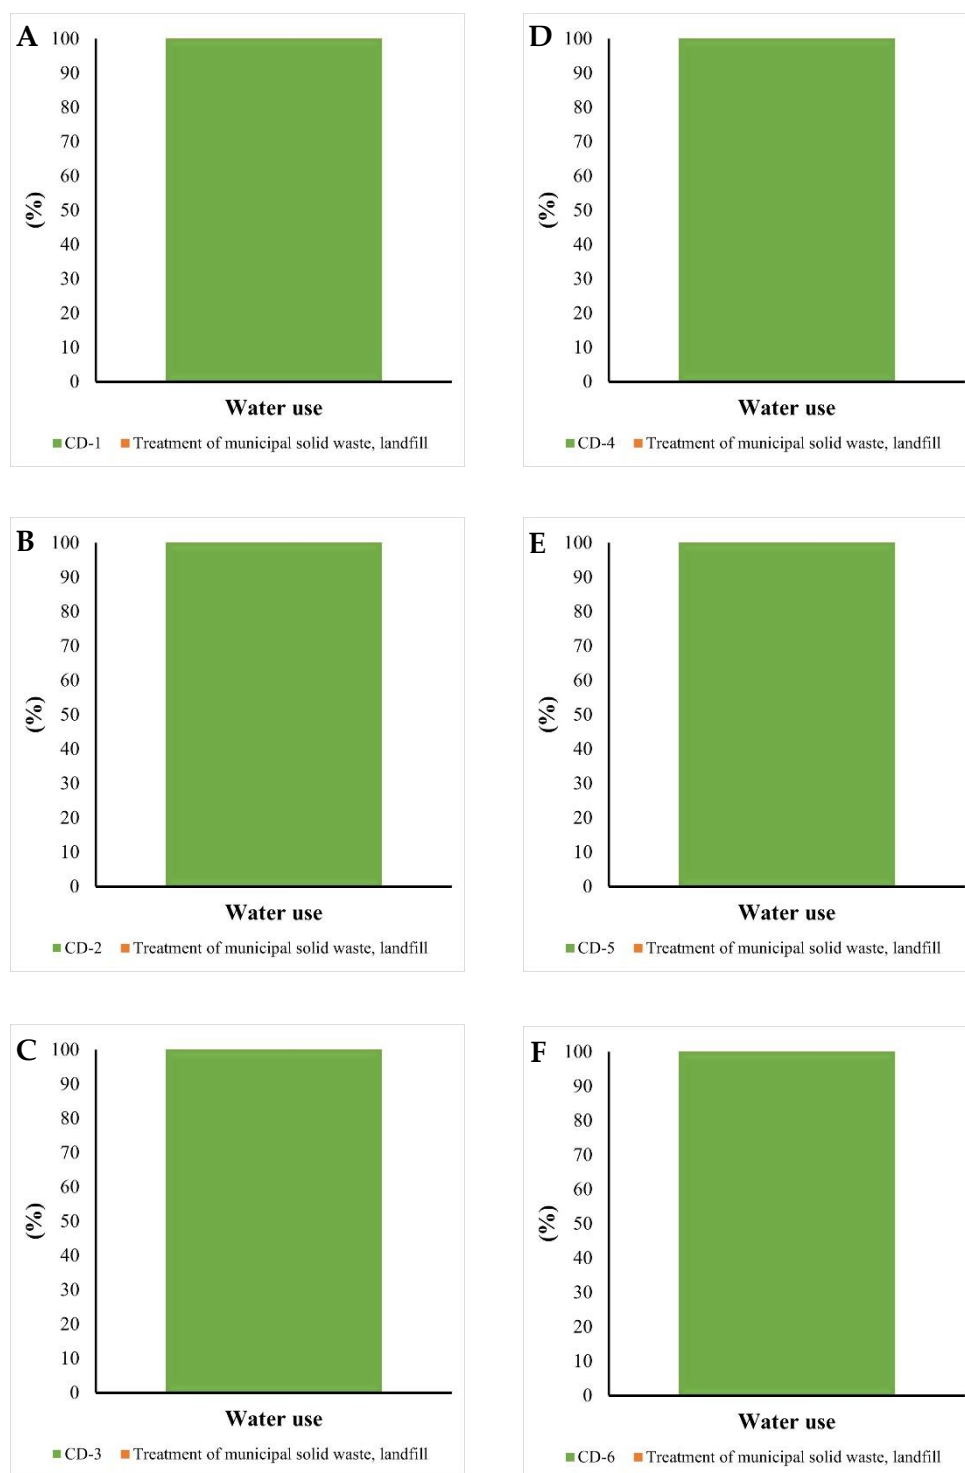

**Figure S10.** Relative environmental impacts of syntheses under for landfill disposal scenario, applying AWARE method. (A) CD-1; (B) CD-2; (C) CD-3; (D) CD-4, (E) CD-5 and (F) CD-6.

## USEtox method

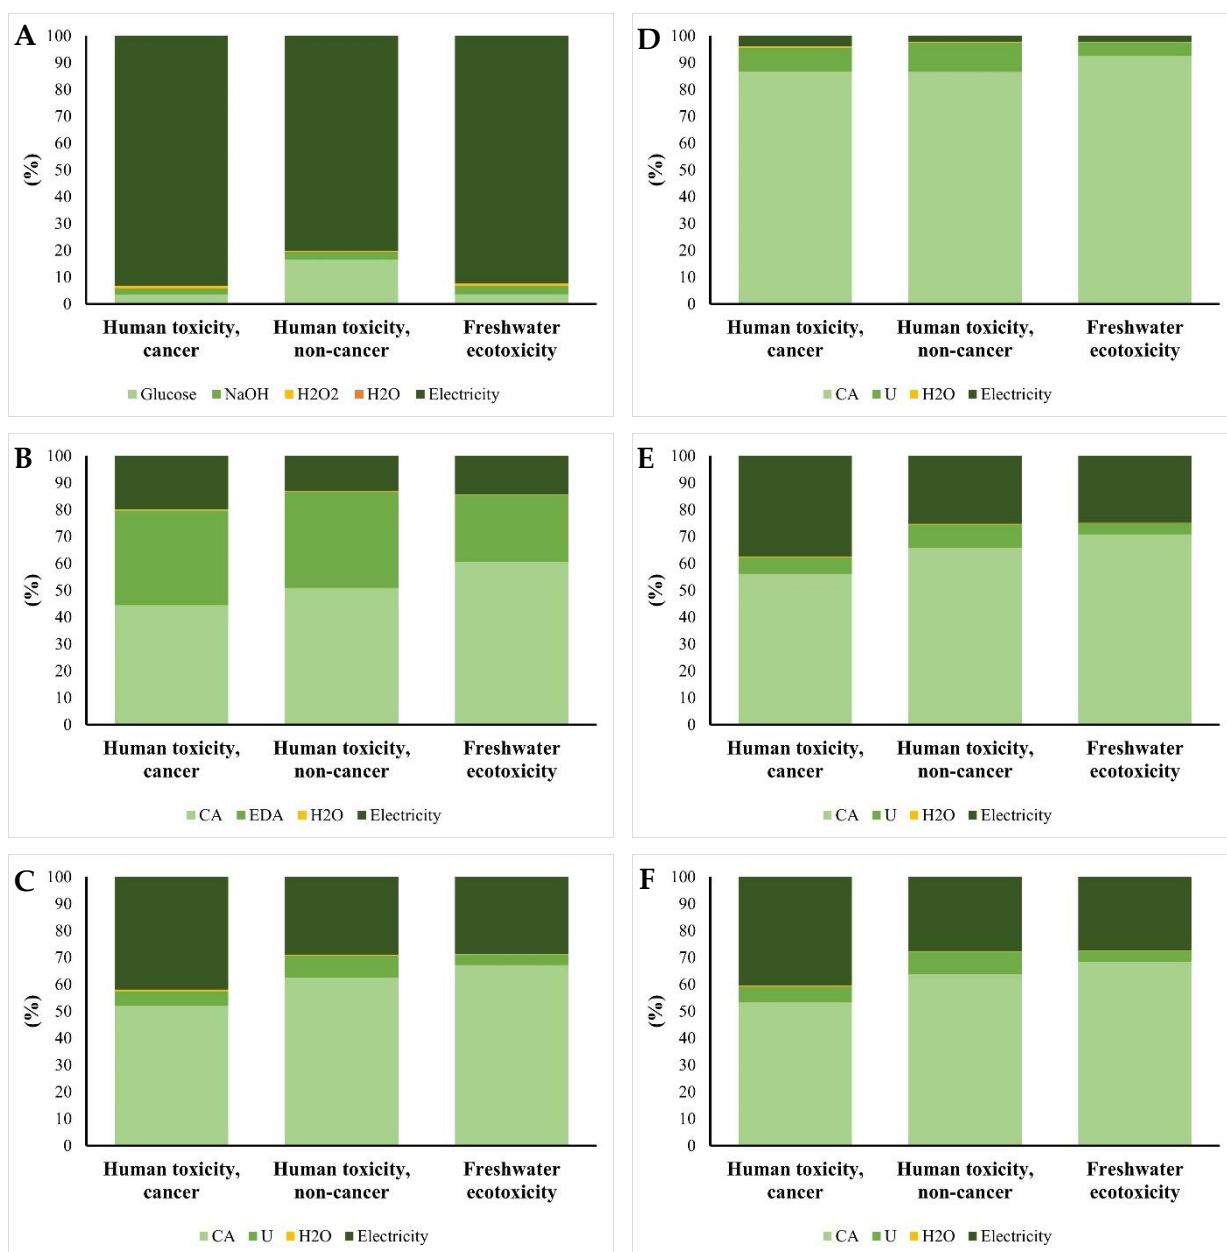

**Figure S11.** Relative environmental impacts of syntheses under, applying USEtox method. (A) CD-1; (B) CD-2, (C) CD-3; (D) CD-4, (E) CD-5 and (F) CD-6.

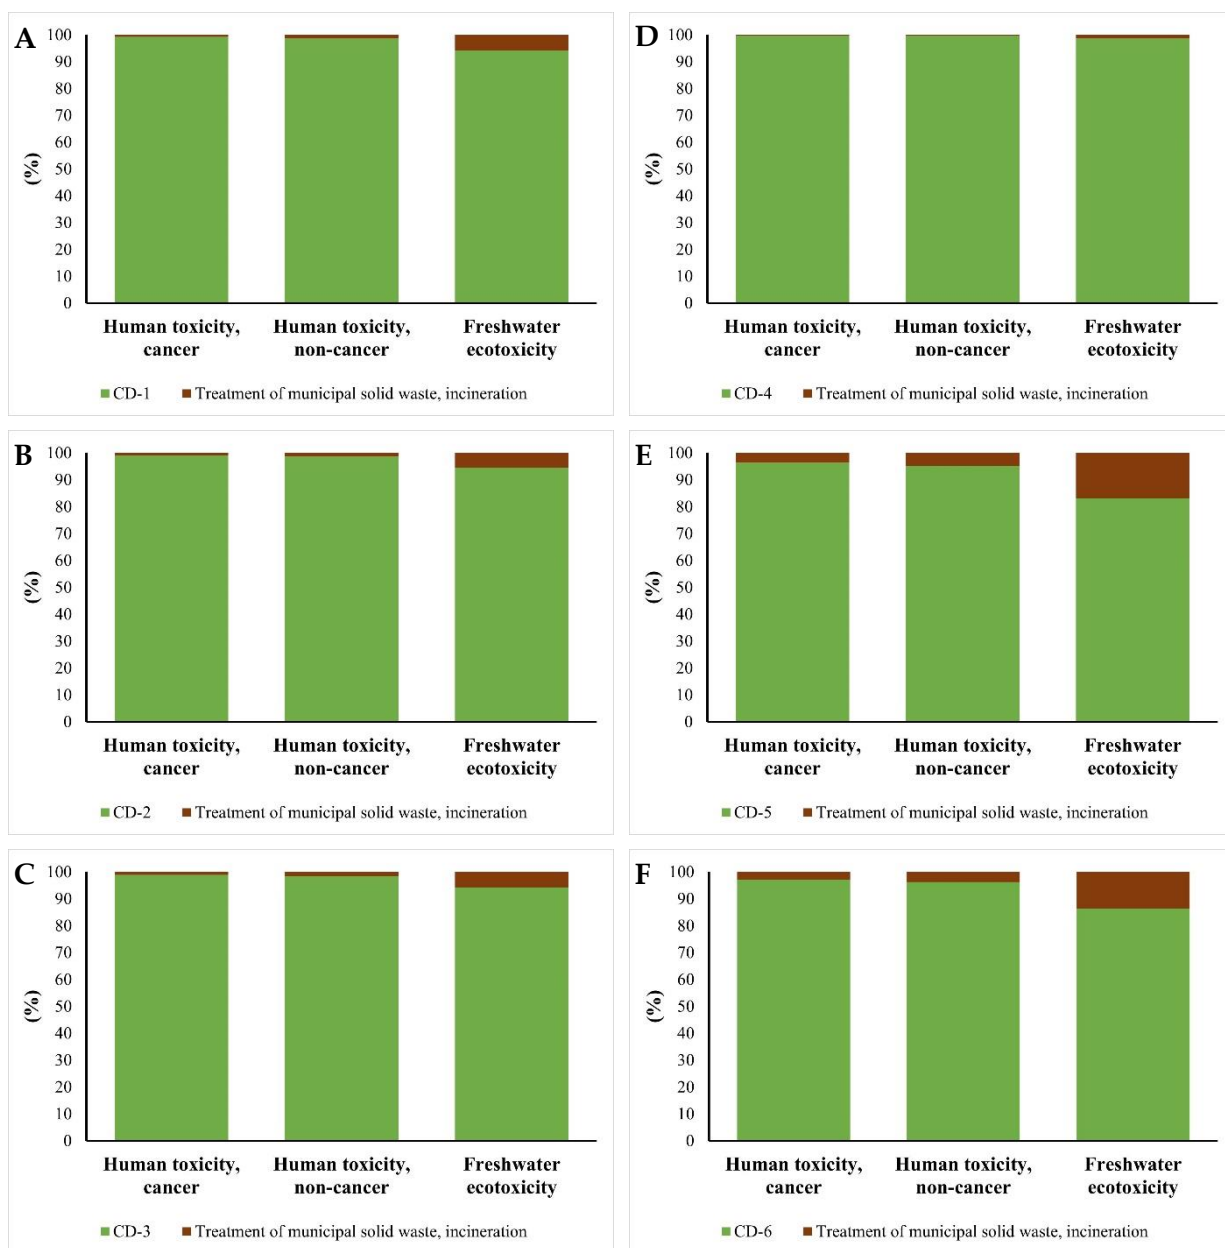

**Figure S12.** Relative environmental impacts of syntheses under for incineration disposal scenario, applying USEtox method. (A) CD-1; (B) CD-2, (C) CD-3; (D) CD-4, (E) CD-5 and (F) CD-6.

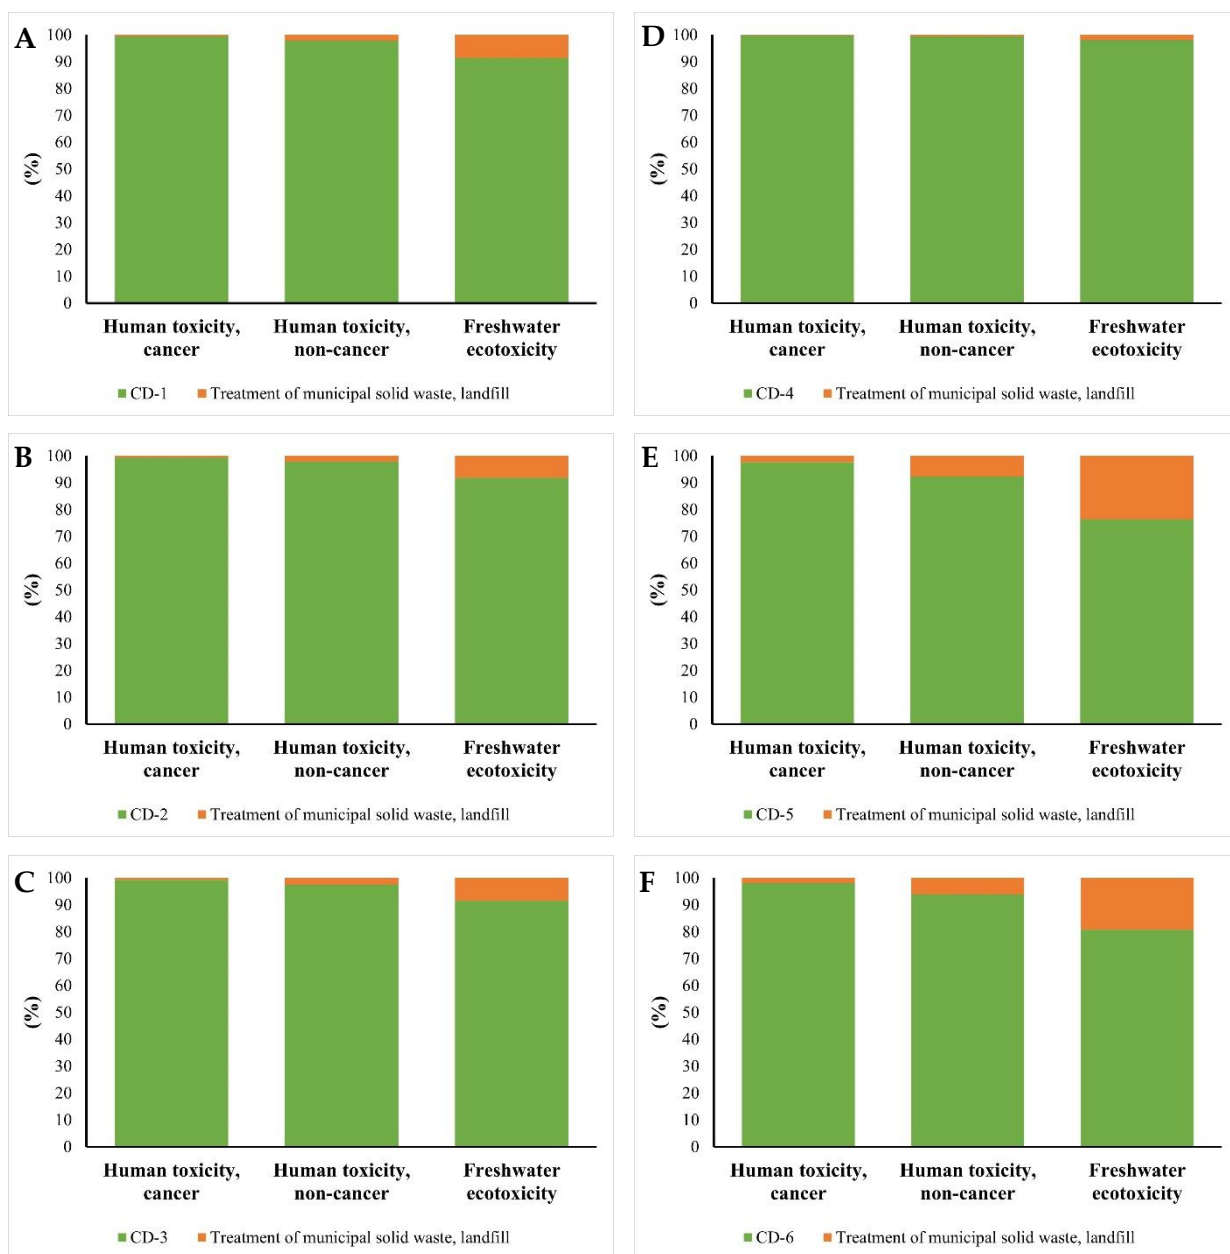

**Figure S13.** Relative environmental impacts of syntheses under for landfill disposal scenario, applying USEtox method. (A) CD-1; (B) CD-2, (C) CD-3; (D) CD-4, (E) CD-5 and (F) CD-6.
